# Supplementary material for: Extensive protein and DNA backbone sampling improves structure-based specificity prediction for C2H2 zinc fingers
Source: PubMed Central journal article supplement — Nucleic Acids Res. 2011 Feb 22;39(11):4564–76. doi: 10.1093/nar/gkr048 (PMC3113574; doi:10.1093/nar/gkr048), 2011-02-22
Supplement: supp_gkr048_supp.pdf [file supp_gkr048_supp.pdf]

# Extensive Protein and DNA Backbone Sampling Improves Structure-based Specificity Prediction for C<sub>2</sub>H<sub>2</sub> Zinc Fingers: Supplementary Information

## 1 Methods

### 1.1 Knowledge-based protein-DNA interaction potential

Using a database of high-resolution co-crystal structures [1], we parameterized a simple protein-DNA interaction potential for use in the low-resolution phase of our fragment assembly simulations. This knowledge-based potential has two components: an environment term, which captures amino acid preferences for being at the protein-DNA interface, and a pair term, which reflects amino acid-nucleotide contact propensities. To fit these two terms, all amino acid-nucleotide pairs within a distance of 12 Å were recorded, and the total number of such nucleotide neighbors for each protein residue was totaled and written out. Distances were calculated by defining a single interaction center for each residue. For amino acids, this position was taken to be the C<sub>β</sub> (C<sub>α</sub> for Gly); for nucleotides, it is calculated by averaging two atoms in the base: N7+N6 for A, C5+N4 for C, N7+O6 for G, and C5M+O4 for T. The neighbor counts were binned (0, 1-2, ..., 11-12, > 12), and a propensity was calculated for each amino acid to have a given number of neighbors by comparing the actual counts for that amino acid with the expected number based on the overall frequency of that amino acid and the frequency of that neighbor bin. To parametrize the environment term, the amino acid-base distances were binned (0-4, 4-6, 6-8, 8-10, 10-12 Å), and a propensity for each (amino acid, base, distance-bin) triple was calculated by comparing the actual counts for that triple to expected counts estimated based on

the independent counts for that amino acid and base in the given bin. All propensities were converted to scores by taking their negative logarithm.

$$\begin{aligned} E_{\text{env}}(aa, b) &= -\log\left(\frac{N(aa, b)}{P(aa)N(b)}\right) \\ &= -\log\left(\frac{N(aa, b)N}{N(aa)N(b)}\right) \\ E_{\text{pair}}(aa, na, d) &= -\log\left(\frac{N(aa, na, d)}{P(aa|d)P(na|d)N(d)}\right) \\ &= -\log\left(\frac{N(aa, na, d)N(d)}{N(aa, d)N(na, d)}\right) \end{aligned}$$

Here  $aa$  is one of the 20 amino acids,  $na$  is one of the 4 bases,  $b$  represents a neighbor-count bin,  $d$  represents a distance bin, and  $N(\cdot)$  indicates the total number of occurrences in the database ( $N$  in formula S1 stands for the total number of amino acids in the database). To compute the score for a model, we find all protein-DNA residue pairs within 12 Å, compute neighbor counts for each amino acid, score each amino acid according to its neighbor propensities, and sum the environment scores for each protein-DNA contact.

### 1.2 Orientation-dependent implicit solvation model

To better model stacking interactions at protein-DNA interfaces, we developed a simple, orientation-dependent variant of the Lazaridis-Karplus (LK) implicit solvent model [2]. In the standard LK model, the interaction energy for two atoms  $a_1$  and  $a_2$  is the sum of two terms, one capturing the desolvation of  $a_1$

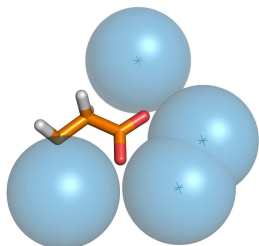

Figure S1: Locations of virtual water atoms used to calculate orientation-dependent desolvation energy of an Asp sidechain.

by  $a_2$ , and one capturing the desolvation of  $a_2$  by  $a_1$ . The magnitude of each contribution depends on the distance between the two atoms and their respective atom types. We modified the desolvation contributions for polar atoms to make them dependent on the relative orientation of the desolvating atom. Virtual water atoms are placed at optimal locations relative to the polar atom based on its expected hybridization state (Fig. S1), and the distance from the desolvating atom to each of these optimal waters is computed. A scaling term for the LK desolvation energy is computed based on the minimal water distance  $d$  using the equation

$$\lambda(d) = \begin{cases} 1 & d < R - w \\ \lambda_0 + (1 - \lambda_0)S\left(\frac{R-d}{w}\right) & R - w \leq d < R \\ \lambda_0 & R \leq d \end{cases}$$

where  $R = 1.4 + R_{LJ}$  is a cutoff distance equal to sum of the Lennard-Jones radii of a water molecule and the desolvating atom,  $w$  is the width of a ramping zone in which the scaling factor interpolates between  $\lambda_0$  and 1 as the desolvating atom approaches the optimal water location, and  $S$  is a sigmoidal interpolation function with  $S(0) = 0$  and  $S(1) = 1$ . We took  $\lambda_0 = 0.5$  and  $w = 0.9$  based on visual inspection of various stacking geometries; it is likely that these parameters could be more systematically optimized.

### 1.3 Comparison with other methods

We compared our structure-based approach with three previously described and publicly accessi-

ble algorithms for predicting ZF-DNA interactions: a structure-based approach incorporating family-specific amino acid-nucleotide interaction preferences learned from experimental binding data [3] (<http://compbio.cs.uji.ac.il/Zinc/>; ‘‘Kaplan05’’); ZIFIBI, which uses a hidden Markov model to generate binding site predictions [4] (<http://bioinfo.anyang.ac.kr/ZIFIBI/>); and a recent machine-learning approach that incorporates data on binding and non-binding DNA sites through the use of a support vector machine [5] (<http://compbio.cs.princeton.edu/zf/>); ‘‘Persikov09’’). Giventat experimental binding data for the proteins of known structure were likely used to train one or more of these methods, we restricted the comparison to the six ZF proteins without solved structures whose specificities were recently profiled by protein binding microarrays [6]. As it was not straightforward to generate full PFMs for each algorithm, we focused on the simple metric that counts the number of positions at which the preferred base in prediction and experiment agree. Predictions for the Kaplan05 algorithm were generated through the web server. For several of the sequences, the algorithm only generated a binding prediction for a single finger, although the results suggested that other fingers were identified in the sequence. For these targets, we resubmitted subsequences to generate predictions for all fingers. ZIFIBI predictions only depend on the amino acids at helix positions  $-1$ ,  $3$  and  $6$ . These amino acid triplets were entered into the web form to generate predictions for the benchmark proteins. The Persikov09 algorithm does not generate binding specificity profiles for a target zinc finger protein; instead, it searches an input DNA sequence for potential binding sites and ranks them according to an energy model. To compare with the experimental profiles, we downloaded the SVM models and performed searches against DNA sequences containing all 4-mers in order to identify optimal binding sites for each finger. The top-scoring site was compared to the experimental data. The results reported in the main text are for the linear kernel model, which recovered 31 out of 36 positions. Interestingly, the polynomial kernel model, which was reported to be

superior in prediction accuracy [5], recovered only 30 of 36 positions.

## 2 Results

### 2.1 Variation in Protein-DNA interface geometry

The interface fragment assembly protocol depends on the existence of template structures with similar interface geometries from which to extract interface fragments. If interface geometry is more conserved in the zinc finger protein family than in other families of DNA-binding proteins, the protocol might not be expected to perform as well on these other families. To test this, we collected representative protein structures from three other eukaryotic transcription factor families: the homeodomains, the b-ZIP proteins, and the b-HLH proteins. We aligned each family by defining a core interface consisting of 7 residues in an alpha-helix, and three base-pairs of DNA. We then computed pairwise RMSD values over these 13 residues, and compared the distribution of RMSDs to the distribution obtained for the ZF proteins in our benchmark (using the 7 helix positions  $-1$  through  $6$  and the corresponding DNA triplet). The results are given in Figure S2, which shows that the ZF protein-DNA interfaces are, in fact, slightly more diverse than those of these other protein families. This result suggests that the interface fragment assembly algorithm may yield useful predictions for these families as well.

## References

- [1] Havranek, J. J., Duarte, C. M., and Baker, D. (2004) A simple physical model for the prediction and design of protein-DNA interactions. *J Mol Biol*, **344**(1), 59–70.
- [2] Lazaridis, T. and Karplus, M. (1999) Effective energy function for proteins in solution. *Proteins*, **35**(2), 133–52.
- [3] Kaplan, T., Friedman, N., and Margalit, H. (2005) Ab initio prediction of transcription factor targets using structural knowledge. *PLoS Comput Biol*, **1**(1), e1.
- [4] Cho, S. Y., Chung, M., Park, M., Park, S., and Lee, Y. S. (2008) ZIFIBI: Prediction of DNA binding sites for zinc finger proteins. *Biochem Biophys Res Commun*, **369**(3), 845–8.

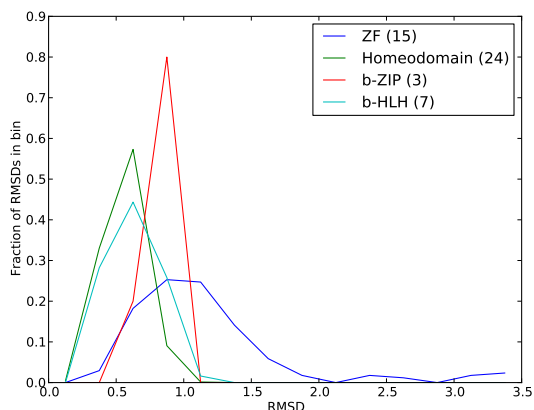

Figure S2: Interface RMSD distributions for DNA-binding protein families. For each family, we aligned the indicated number of representative protein structures using a core interface (7 protein and 6 DNA residues) and computed pairwise RMSD values. The RMSD values were binned with a bin size of  $0.25\text{\AA}$ ; the resulting distributions are plotted here using the midpoints of the bins.

- [5] Persikov, A. V., Osada, R., and Singh, M. (2009) Predicting DNA recognition by Cys2His2 zinc finger proteins. *Bioinformatics*, **25**(1), 22–9.
- [6] Zhu, C., Byers, K. J., McCord, R. P., Shi, Z., Berger, M. F., Newburger, D. E., Saulrieta, K., Smith, Z., Shah, M. V., Radhakrishnan, M., Philippakis, A. A., Hu, Y., De Masi, F., Pacek, M., Rolfs, A., Murthy, T., Labaer, J., and Bulyk, M. L. (2009) High-resolution DNA-binding specificity analysis of yeast transcription factors. *Genome Res*, **19**(4), 556–66.
- [7] Siggers, T. W., Silkov, A., and Honig, B. (2005) Structural alignment of protein-DNA interfaces: insights into the determinants of binding specificity. *J Mol Biol*, **345**(5), 1027–45.
- [8] Maeder, M. L., Thibodeau-Beganny, S., Sander, J. D., Voytas, D. F., and Joung, J. K. (2009) Oligomerized pool engineering (OPEN): an 'open-source' protocol for making customized zinc-finger arrays. *Nat Protoc*, **4**(10), 1471–501.
- [9] Fu, F., Sander, J. D., Maeder, M., Thibodeau-Beganny, S., Joung, J. K., Dobbs, D., Miller, L., and Voytas, D. F. (2009) Zinc Finger Database (ZiFDB): a repository for information on C2H2 zinc fingers and engineered zinc-finger arrays. *Nucleic Acids Res*, **37**(Database issue), D279–83.

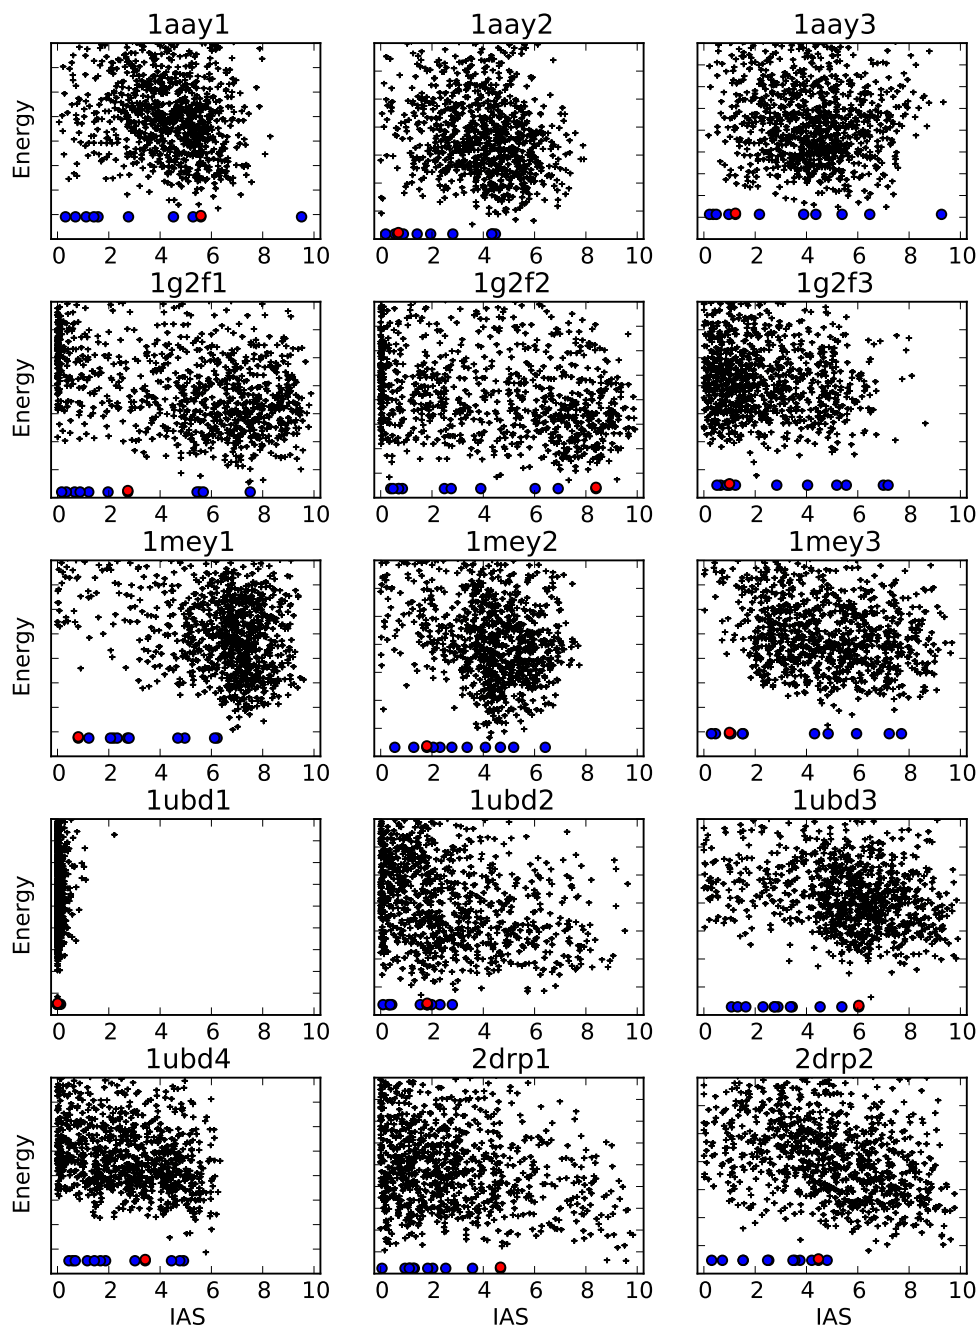

Figure S3: Scatter plots of IAS score [7] (x-axis) against all-atom energy (y-axis) for fragment assembly models built for the 15 individual zinc fingers with solved structures in the benchmark set. Blue circles along the bottom indicate the IAS similarity values for all templates used in fragment selection. The red circle marks the template with highest sequence similarity. The IAS score ranges from 0 to 10 and increases with increasing interface similarity. Y-axis tick marks are shown at 5.0 energy unit spacing ( $\sim 6.5$  kcal/mol).

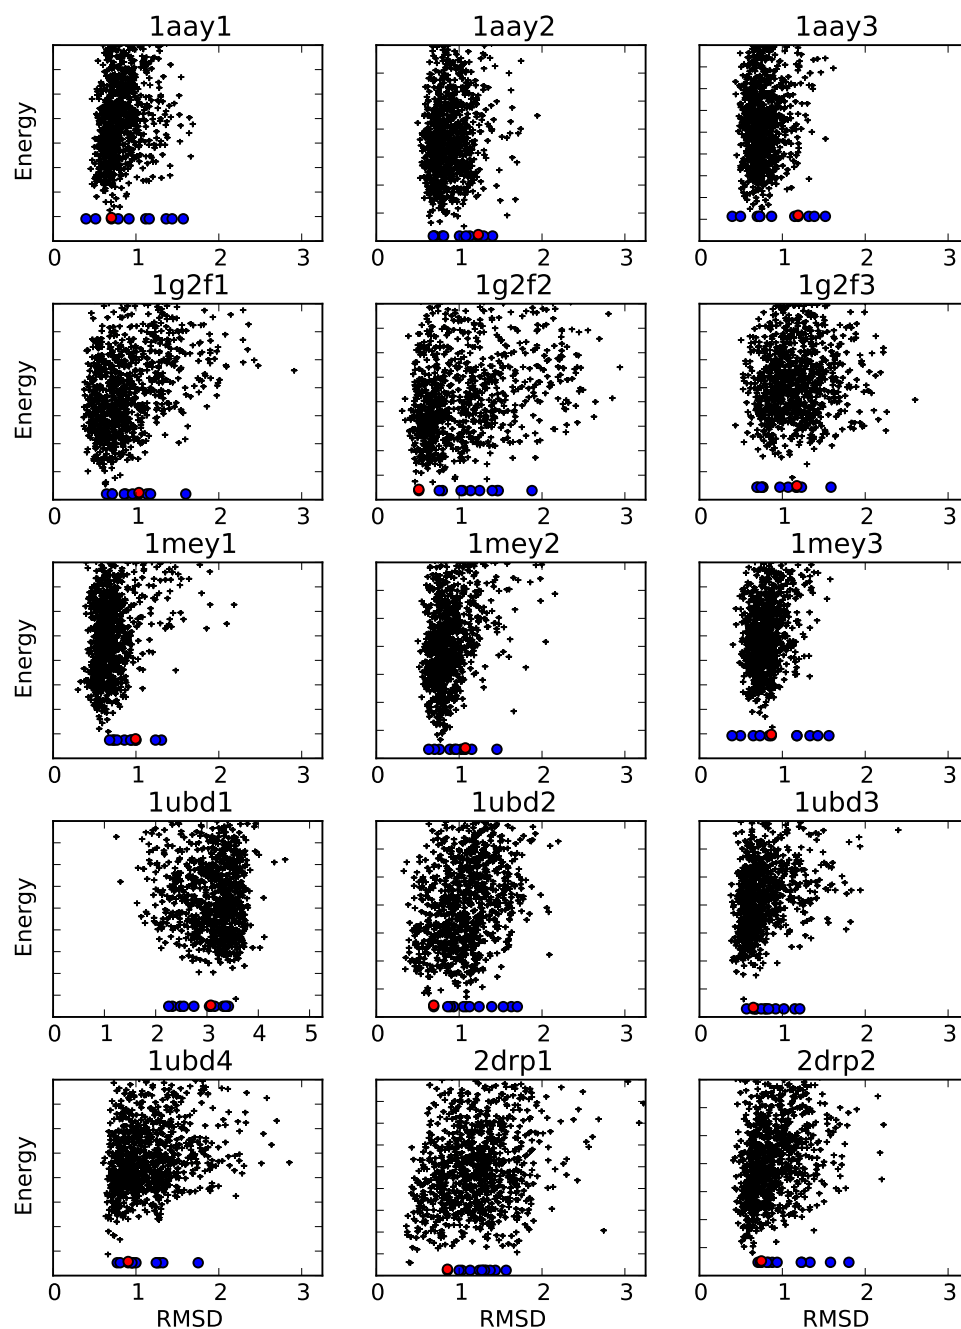

Figure S4: Scatter plots of RMSD (x-axis; computed over  $C_{\alpha}$  atoms for helix positions -1 to 6 and  $C1'$  atoms for both strands of the triplet binding site) against all-atom energy (y-axis) for fragment-assembly models built for the 15 individual zinc fingers with solved structures in the benchmark set. Blue circles along the bottom indicate the RMSD values for all templates used in fragment selection. The red circle marks the template with highest sequence similarity. Y-axis tick marks are shown at 5.0 energy unit spacing ( $\sim 6.5$  kcal/mol).

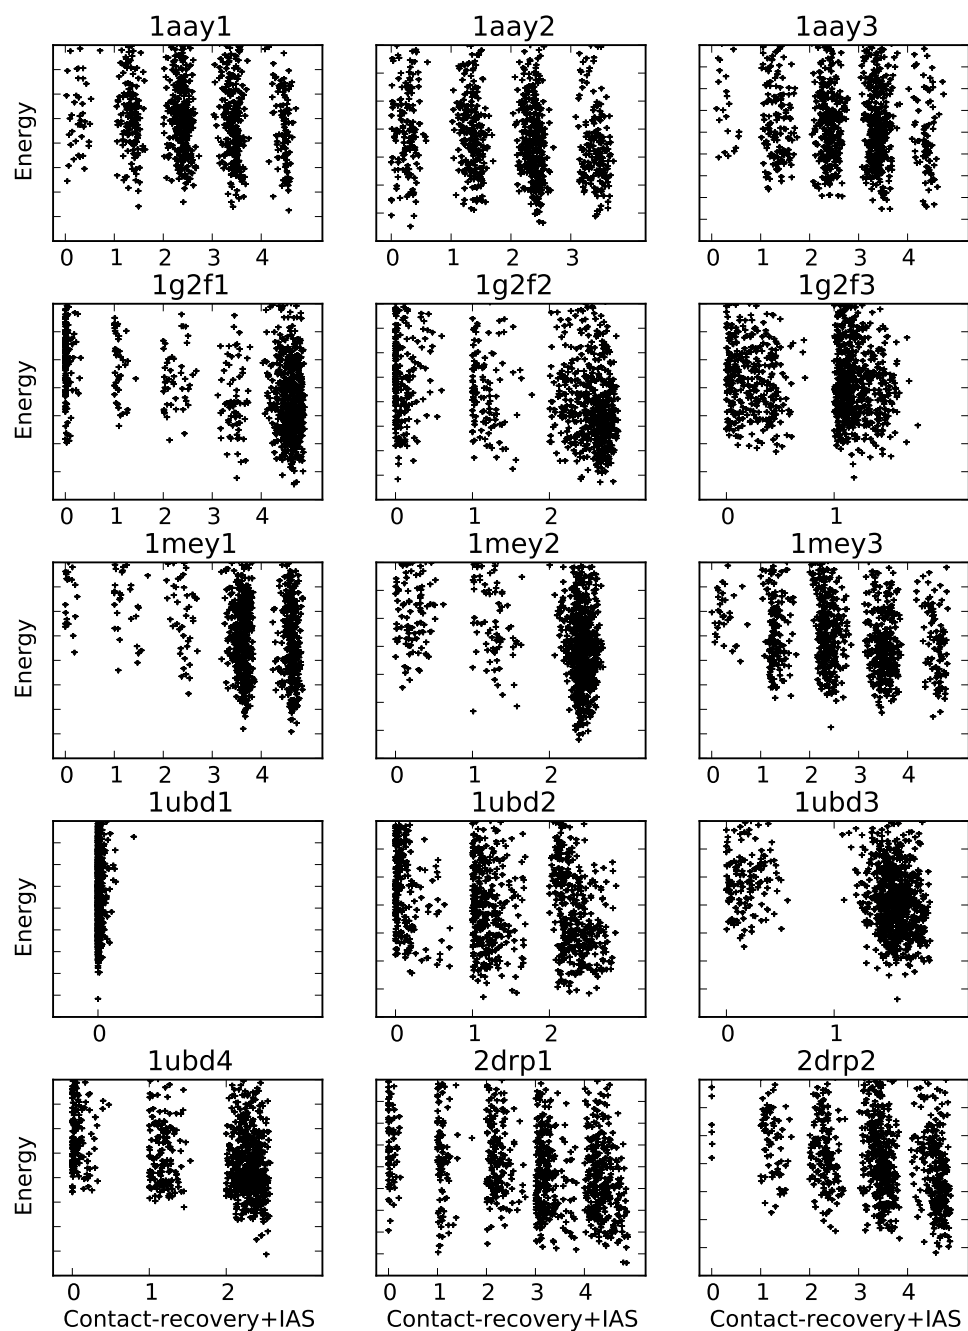

Figure S5: Scatter plots of all-atom energy (y-axis) versus a similarity score that combines contact recovery and IAS score [7] (x-axis). The IAS score is multiplied by 0.09 so that models with different numbers of recovered native contacts can be differentiated. Contacts correspond to protein-DNA hydrogen bonds to major groove atoms in the triplet binding site (1ubd finger 1 has no such contacts). The IAS score ranges from 0 to 10 and increases with increasing interface similarity. Y-axis tick marks are shown at 5.0 energy unit spacing ( $\sim 6.5$  kcal/mol).

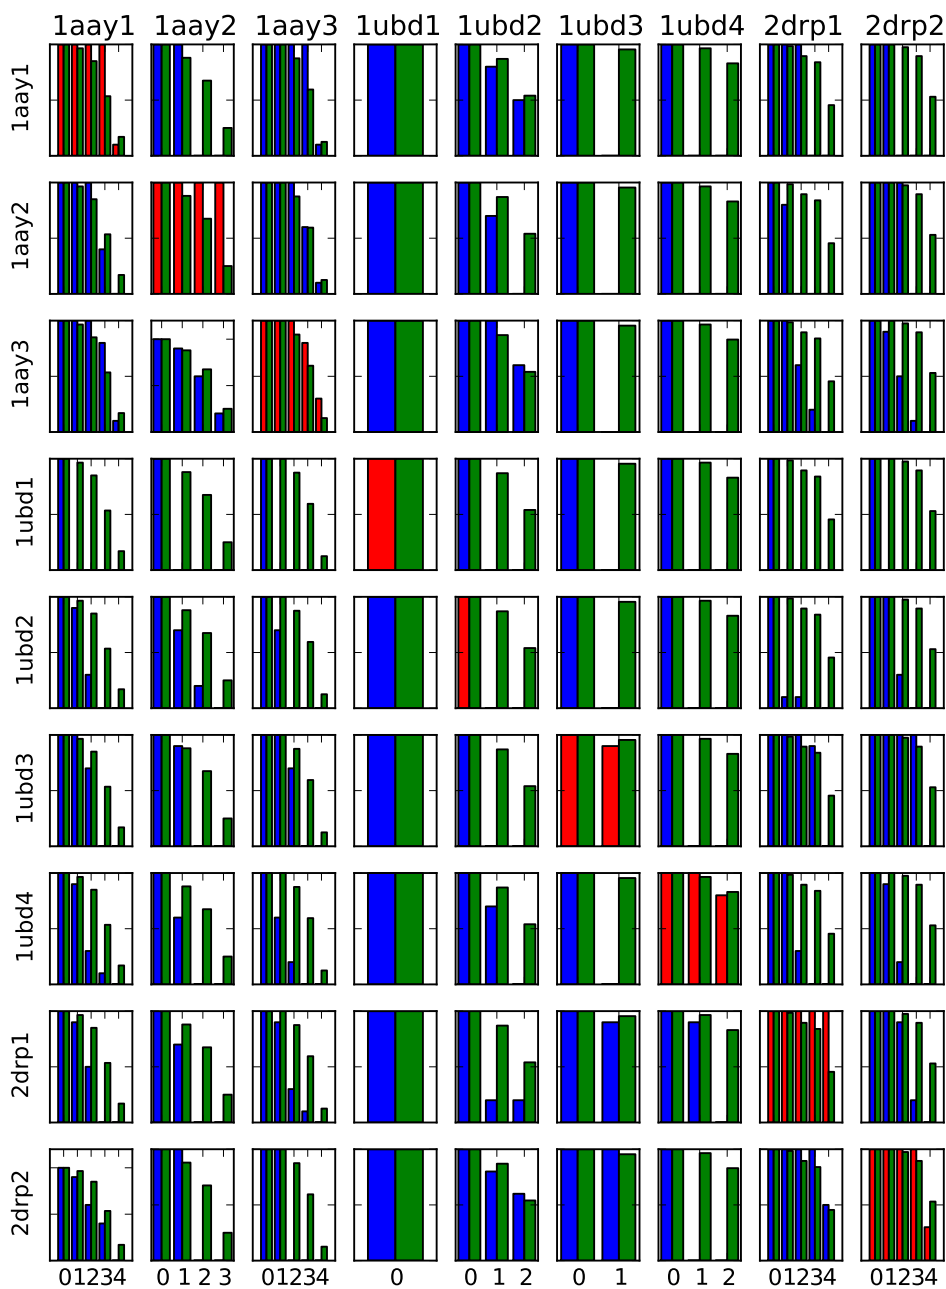

Figure S6: Cumulative contact recovery histograms comparing fragment assembly models to fixed-backbone homology models built by template-based sidechain prediction. Red/blue bars in a given row and column represent models built for the target corresponding to that column using the template backbone corresponding to that row; blue bars represent non-self-template models, and the red bars represent the models built with the target backbone itself. Green bars represent fragment assembly models. The height of each bar represents the fraction of all models recovering at least that many native contacts. Contacts correspond to protein-DNA hydrogen bonds to major groove atoms in the triplet binding site (1ubd finger 1 has no such contacts).



| ID  | Target site | Predicted site       | ID  | Target site | Predicted site        | ID  | Target site | Predicted site        |
|-----|-------------|----------------------|-----|-------------|-----------------------|-----|-------------|-----------------------|
| 211 | GTCGGGGTA   | <u>GCCGGGGCA</u> (7) | 212 | GTCGGGGTA   | <u>GCCGGGGCA</u> (7)  | 213 | GTCGGGGTA   | TAATGGGCA (4)         |
| 214 | GTCGGGGTA   | <u>GCCGGGGCA</u> (7) | 215 | GTCGGGGTA   | <u>GCCGGGGCA</u> (7)  | 216 | GTCGGGGTA   | <u>GCCTGGGCA</u> (6)  |
| 217 | GTCGGGGTA   | <u>GCCGGGGCA</u> (7) | 218 | GTCGGGGTA   | <u>GTCCGGGGCA</u> (8) | 219 | GTCGGGGTA   | <u>GTCCGGGGCA</u> (8) |
| 220 | GTCGGGGTA   | <u>GCCGGGGCA</u> (7) | 221 | GTCGGGGTA   | <u>GCCGGGGCA</u> (7)  | 222 | GTCGGGGTA   | <u>GCCGGGGCA</u> (7)  |
| 223 | GAAGCAGCA   | <u>GAAGCAGGC</u> (7) | 224 | GAAGCAGCA   | <u>GAAGCAGCT</u> (8)  | 225 | GAAGCAGCA   | <u>GAAGCAGCT</u> (8)  |
| 226 | GAAGCAGCA   | <u>GAAGCAGCG</u> (8) | 227 | GAAGCAGCA   | <u>GAAGCAGGA</u> (8)  | 228 | GAAGCAGCA   | <u>GAAGCAGCT</u> (8)  |
| 229 | GAAGCAGCA   | <u>GAAGCAGCT</u> (8) | 230 | GAAGCAGCA   | <u>GAAGCAGCG</u> (8)  | 231 | GAAGCAGCA   | <u>GAAGCAGCG</u> (8)  |
| 232 | GAAGCAGCA   | <u>GAAGCAGCG</u> (8) | 233 | GAAGCAGCA   | <u>GAAGCAGAA</u> (8)  | 234 | GAAGCAGCA   | <u>GAAGCAGCG</u> (8)  |
| 235 | GAAGATGGT   | <u>GAAGATGTA</u> (7) | 236 | GAAGATGGT   | <u>GAAGATTTA</u> (6)  | 237 | GAAGATGGT   | <u>GAAGATGTT</u> (8)  |
| 238 | GAAGATGGT   | <u>GAAGAAGCC</u> (6) | 239 | GAAGATGGT   | <u>GATGATGTT</u> (7)  | 240 | GAAGATGGT   | <u>GAAGATGTT</u> (8)  |
| 241 | GAAGATGGT   | <u>GATGATGTA</u> (8) | 242 | GAAGATGGT   | <u>GAAGATGTT</u> (8)  | 243 | GAAGATGGT   | <u>GAAGCATTT</u> (5)  |
| 244 | GAAGATGGT   | <u>GAAGATGTT</u> (6) | 245 | GAAGATGGT   | <u>GATGCTGTG</u> (5)  | 246 | GAAGATGGT   | <u>GAAGATGTT</u> (8)  |
| 247 | GACGACGGC   | <u>GAAGAAGGC</u> (7) | 248 | GACGACGGC   | <u>GAAGATGGC</u> (7)  | 249 | GACGACGGC   | <u>GAAGATGGC</u> (7)  |
| 250 | GACGACGGC   | <u>GACGACGGA</u> (8) | 251 | GACGACGGC   | <u>GAAGACGGC</u> (8)  | 252 | GACGACGGC   | <u>GACGATGGC</u> (8)  |
| 253 | GACGACGGC   | <u>GACGACGGC</u> (9) | 254 | GACGACGGC   | <u>GACGATGGC</u> (8)  | 255 | GACGACGGC   | <u>GACGATGGC</u> (8)  |
| 256 | GACGACGGC   | <u>GAAGACGGC</u> (8) | 257 | GTCGATGCC   | <u>GTGGCTGAC</u> (6)  | 258 | GTCGATGCC   | <u>GCCGATGCC</u> (8)  |
| 259 | GTCGATGCC   | <u>GCCGATGCT</u> (7) | 260 | GTCGATGCC   | <u>GCCGACGCC</u> (8)  | 261 | GTCGATGCC   | <u>GCCGATGCC</u> (8)  |
| 262 | GTCGATGCC   | <u>GCCGATGCC</u> (8) | 263 | GTCGATGCC   | <u>GCCGATGCC</u> (8)  | 264 | GTCGATGCC   | <u>GCCGATGCC</u> (8)  |
| 265 | GTCGATGCC   | <u>GCCGATGCC</u> (8) | 266 | GAGGACGGC   | <u>GTGGACGGC</u> (8)  | 267 | GAGGACGGC   | <u>GGGGAAGGC</u> (7)  |
| 268 | GAGGACGGC   | <u>GACGACGGC</u> (8) | 269 | GAGGACGGC   | <u>GAGGATGGC</u> (8)  | 270 | GAGGACGGC   | <u>GAGGACGGC</u> (9)  |
| 271 | GAGGACGGC   | <u>GACGACGGC</u> (8) | 272 | GAGGACGGC   | <u>GGGGAAGGC</u> (7)  | 273 | GAGGACGGC   | <u>GGGACGGC</u> (8)   |
| 274 | GAGGACGGC   | <u>GAGGATGGC</u> (8) | 275 | GAGGACGGC   | <u>GTGGACGGC</u> (8)  | 276 | GAGGACGGC   | <u>GAGGACTTA</u> (6)  |
| 277 | GTGGCGGAT   | <u>GTGGGGTGT</u> (6) | 278 | GTGGCGGAT   | <u>GTGGGGTAT</u> (7)  | 279 | GTGGCGGAT   | <u>GTGGCGGTT</u> (8)  |
| 280 | GTGGCGGAT   | <u>GTGGCGGTT</u> (8) | 281 | GTGGCGGAT   | <u>GTGGCGTAT</u> (8)  | 282 | GTGGCGGAT   | <u>GTGGCGGTT</u> (7)  |
| 283 | GTGGCGGAT   | <u>GGGGCGGTT</u> (7) | 284 | GTGGCGGAT   | <u>GTGGCGGTT</u> (8)  | 285 | GAGGACGGC   | <u>GAGGACGGC</u> (9)  |
| 286 | GAGGACGGC   | <u>GAGGACGGC</u> (9) | 287 | GAGGACGGC   | <u>TTGGACGGC</u> (7)  | 288 | GAGGACGGC   | <u>GAAGACGGC</u> (8)  |
| 289 | GAGGACGGC   | <u>GAGGACGGC</u> (9) | 290 | GAGGACGGC   | <u>GAGGACGGC</u> (9)  | 291 | GAGGACGGC   | <u>GAGGATGGC</u> (8)  |
| 292 | GAGGACGGC   | <u>GAGGACGGC</u> (9) | 293 | GCCGTCGCC   | <u>GACGCGGCC</u> (7)  | 294 | GCCGTCGCC   | <u>GCCGCGGCC</u> (8)  |
| 295 | GCCGTCGCC   | <u>GCCGCGGCC</u> (8) | 296 | GCCGTCGCC   | <u>GCCGCGGCC</u> (8)  | 297 | GCCGTCGCC   | <u>GTCGCGGCC</u> (7)  |
| 298 | GCCGTCGCC   | <u>GTCGCGGCC</u> (7) | 299 | GCCGTCGCC   | <u>GACGCGGCC</u> (7)  | 300 | GCCGTCGCC   | <u>GCCGCGGTC</u> (7)  |
| 301 | GCCGTCGCC   | <u>GCCGCGGCC</u> (8) | 302 | GCCGTCGCC   | <u>GACGTGGCC</u> (7)  | 303 | GCCGTCGCC   | <u>GACGTGGCC</u> (7)  |
| 304 | GCCGTCGCC   | <u>GACGTGGCC</u> (7) | 305 | GCCGTCGCC   | <u>GACGTGGCC</u> (7)  | 306 | GCCGTCGCC   | <u>GACGTGGCC</u> (7)  |
| 307 | GCCGTCGCC   | <u>GACGTGGCC</u> (7) | 308 | GCCGTCGCC   | <u>GCCGCGGTA</u> (6)  | 309 | GCTGCTGCC   | <u>GCTGCTGTC</u> (8)  |
| 310 | GCTGCTGCC   | <u>GCTGCTGCT</u> (8) | 311 | GCTGCTGCC   | <u>GCCGATGCC</u> (7)  | 312 | GCTGCTGCC   | <u>GCCGATGCC</u> (7)  |
| 313 | GCTGCTGCC   | <u>GCCGATGCC</u> (7) | 314 | GCTGCTGCC   | <u>GCCGATGCC</u> (7)  | 315 | GCTGCTGCC   | <u>GCCGCGGCC</u> (7)  |
| 316 | GCTGCTGCC   | <u>GCCGATGCC</u> (7) | 317 | TTAGAAGTG   | <u>TTAGAATGG</u> (7)  | 318 | TTAGAAGTG   | <u>TTAGAATTG</u> (8)  |
| 319 | TTAGAAGTG   | <u>TTAGGGGGC</u> (6) | 320 | TTAGAAGTG   | <u>TTAGAAGAG</u> (8)  | 321 | TTAGAAGTG   | <u>TTAGAATTG</u> (8)  |
| 322 | TTAGAAGTG   | <u>TTAGGGGGC</u> (6) | 323 | TTAGAAGTG   | <u>TTAGAATTG</u> (8)  | 324 | TTAGAAGTG   | <u>TTAGAAGAG</u> (8)  |
| 325 | TTAGAAGTG   | <u>TTAGAAGAG</u> (8) | 326 | TTAGAAGTG   | <u>TTAGAAGGG</u> (8)  | 327 | TTAGAAGTG   | <u>TTAGAATTG</u> (8)  |
| 328 | TTAGAAGTG   | <u>TTAGAAGAG</u> (8) | 329 | TTATGGGAG   | <u>TTATAGGAG</u> (8)  | 330 | TTATGGGAG   | <u>TTATGGGAG</u> (9)  |
| 331 | TTATGGGAG   | <u>TTATAGGAG</u> (8) | 332 | TTATGGGAG   | <u>TTATGGGAC</u> (8)  | 333 | TTATGGGAG   | <u>TTATGGGAC</u> (8)  |
| 334 | TTATGGGAG   | <u>TTATGGGAC</u> (8) | 335 | TTATGGGAG   | <u>TTATGGGAC</u> (8)  | 336 | TTATGGGAG   | <u>TTATAGGAC</u> (7)  |
| 337 | TTATGGGAG   | <u>TTATAGGAG</u> (8) | 338 | TTATGGGAG   | <u>TTATAGGAC</u> (7)  | 339 | TTATGGGAG   | <u>TTATAGGAG</u> (8)  |
| 340 | TTATGGGAG   | <u>TTATGGGAG</u> (9) | 341 | TTATGGGAG   | <u>TTATAGGAC</u> (7)  | 342 | TTATGGGAG   | <u>TTATGGGAG</u> (9)  |
| 343 | TTATGGGAG   | <u>TTATGGGAC</u> (8) | 344 | TTATGGGAG   | <u>TTATGGGAG</u> (9)  | 345 | TTATGGGAG   | <u>TTATAGGAC</u> (7)  |
| 346 | TTATGGGAG   | <u>TTATAGGAC</u> (7) | 347 | TTATGGGAG   | <u>TTATGGGAG</u> (9)  | 348 | TTATGGGAG   | <u>TTATAGGAC</u> (7)  |
| 349 | TTATGGGAG   | <u>TTATAGGAC</u> (7) | 350 | TTATGGGAG   | <u>TTATGGGAC</u> (8)  | 351 | TTATGGGAG   | <u>TTATAGGAA</u> (7)  |
| 352 | TTATGGGAG   | <u>TTATAGGAC</u> (7) | 353 | GAAGACGCT   | <u>GAAGAAGCA</u> (7)  | 354 | GAAGACGCT   | <u>GAAGATGCC</u> (7)  |
| 355 | GAAGACGCT   | <u>GAAGACGCA</u> (8) | 356 | GAAGACGCT   | <u>GAAGACGTT</u> (8)  | 357 | GAAGACGCT   | <u>GAAGAAGCA</u> (7)  |
| 358 | GAAGACGCT   | <u>GAAGACGCA</u> (8) | 359 | GAAGACGCT   | <u>GAAGATGCC</u> (7)  | 360 | GAAGACGCT   | <u>GAAGACGTT</u> (8)  |
| 361 | GAAGACGCT   | <u>GAAGATGCC</u> (7) | 362 | GAAGACGCT   | <u>GAAGATGCC</u> (7)  | 363 | GAAGACGCT   | <u>GAAGACGTC</u> (7)  |
| 364 | GAAGACGCT   | <u>GAAGATGCC</u> (7) | 365 | GAGGACGTG   | <u>GAGGACCTG</u> (8)  | 366 | GAGGACGTG   | <u>GAGGACGTC</u> (9)  |
| 367 | GAGGACGTG   | <u>GAGGACGTC</u> (9) | 368 | GAGGACGTG   | <u>GAGGACGAG</u> (7)  | 369 | GAGGACGTG   | <u>GAGGACGTC</u> (9)  |
| 370 | GAGGACGTG   | <u>GAGGACGTC</u> (9) | 371 | GAGGACGTG   | <u>GAGGACGTC</u> (9)  | 372 | GAGGACGTG   | <u>GAGGACTGG</u> (7)  |
| 373 | GAGGACGTG   | <u>GAGGAAATG</u> (7) | 374 | GAGGACGTG   | <u>GAGGAAATG</u> (7)  | 375 | GAGGACGTG   | <u>GTGGACGAG</u> (7)  |
| 376 | GAGGACGTG   | <u>GGGACGAG</u> (7)  | 377 | GGAGGTGGT   | <u>GGAGGCTGT</u> (7)  | 378 | GGAGGTGGT   | <u>GGAGGTTGT</u> (8)  |
| 379 | GGAGGTGGT   | <u>GGAGGCTGT</u> (7) | 380 | GGAGGTGGT   | <u>GGAGGTTGT</u> (8)  | 381 | GGAGGTGGT   | <u>GGAGGCTGT</u> (7)  |
| 382 | GGAGGTGGT   | <u>GGAGGCGGC</u> (7) | 383 | GGAGGTGGT   | <u>GGAGGCTGT</u> (7)  | 384 | GGAGGTGGT   | <u>GGAGGCTGG</u> (6)  |
| 385 | GGAGGTGGT   | <u>GGAGGCTGT</u> (7) | 386 | GGAGGTGGT   | <u>GGAGGCTGT</u> (7)  | 387 | GGAGGTGGT   | <u>GGAGGCTGT</u> (7)  |
| 388 | GGAGGTGGT   | <u>GGAGGCTGT</u> (7) | 389 | GCCGGCGGC   | <u>GACGGTGGG</u> (6)  | 390 | GCCGGCGGC   | <u>GACGGTGGG</u> (6)  |
| 391 | GCCGGCGGC   | <u>GACGGTGGG</u> (6) | 392 | GCCGGCGGC   | <u>GACGGCGGC</u> (8)  | 393 | GCCGGCGGC   | <u>GACGGTGGG</u> (6)  |
| 394 | GCCGGCGGC   | <u>GACGGCGGC</u> (8) | 395 | GCCGGCGGC   | <u>GACGGCGGC</u> (8)  | 396 | GCCGGCGGC   | <u>GACGGTGGG</u> (6)  |
| 397 | GCCGGCGGC   | <u>GACGGCGGC</u> (8) | 398 | GGAGGAGGT   | <u>GGAGGAGGC</u> (8)  | 399 | GGAGGAGGT   | <u>GGAGGAGGC</u> (8)  |

Table S1: Specificity predictions for OPEN [8] zinc finger arrays: ZiFDB [9] array ID; target site for which the 3-finger array was selected; binding site predicted by structural simulations; count of the number of positions at which the two sites agree (in parentheses). Positions in the predicted site that match the experimental site are underlined.



| ID  | Target site | Predicted site       | ID  | Target site | Predicted site       | ID  | Target site | Predicted site       |
|-----|-------------|----------------------|-----|-------------|----------------------|-----|-------------|----------------------|
| 400 | GGAGGAGGT   | <u>GGAGGAGGC</u> (8) | 401 | GGAGGAGGT   | <u>GGAGGATGT</u> (8) | 402 | GGAGGAGGT   | <u>GGGGAGGAC</u> (4) |
| 403 | GGAGGAGGT   | <u>GGAGGAGGC</u> (8) | 404 | GGAGGAGGT   | <u>GGAGGAGGC</u> (8) | 405 | GGAGGAGGT   | <u>GGAGGAGGC</u> (8) |
| 406 | GGAGGAGGT   | <u>GGAGGAGGC</u> (8) | 407 | GGAGGAGGT   | <u>GGAGGAGGC</u> (8) | 408 | GGAGGAGGT   | <u>GGAGGAGGC</u> (8) |
| 409 | GGAGGAGGT   | <u>GGAGGAGGC</u> (8) | 410 | GGCGGCGGA   | <u>GCGGGGGAA</u> (5) | 411 | GGCGGCGGA   | <u>GCGGGGGAA</u> (5) |
| 412 | GGCGGCGGA   | <u>GGGGCGGAC</u> (4) | 413 | GGCGGCGGA   | <u>GGGGCGGAC</u> (4) | 414 | GGCGGCGGA   | <u>GGGGCGGAC</u> (4) |
| 415 | GGCGGCGGA   | <u>GGGGTGGAA</u> (5) | 416 | GGCGGCGGA   | <u>GGGGCGGAC</u> (4) | 417 | GGCGGCGGA   | <u>GGGGTGGAA</u> (5) |
| 418 | GGCGGCGGA   | <u>GGGGCGGAC</u> (4) | 419 | GGCGGCGGA   | <u>GGGGCGGAC</u> (4) | 420 | GACGCTGCT   | <u>GACGCCGCT</u> (8) |
| 421 | GACGCTGCT   | <u>GACGCCGCT</u> (8) | 422 | GACGCTGCT   | <u>GACGCCGCT</u> (8) | 423 | GACGCTGCT   | <u>GACGCTGCC</u> (8) |
| 424 | GACGCTGCT   | <u>GACGCCGCT</u> (8) | 425 | GACGCTGCT   | <u>GACGCTGCC</u> (8) | 426 | GACGCTGCT   | <u>GACGCAGCC</u> (7) |
| 427 | GACGCTGCT   | <u>GACGCCGCC</u> (7) | 428 | GACGCTGCT   | <u>GACGCCGCT</u> (8) | 429 | GACGCTGCT   | <u>GACGCCGTC</u> (6) |
| 430 | GAGTGAGGA   | <u>GAGTGAGGG</u> (8) | 431 | GAGTGAGGA   | <u>GAGTGAGGG</u> (8) | 432 | GAGTGAGGA   | <u>GAGTGAGGG</u> (8) |
| 433 | GAGTGAGGA   | <u>GAGTGAGGG</u> (8) | 434 | GAGTGAGGA   | <u>GAGTGAGGC</u> (8) | 435 | GAGTGAGGA   | <u>GAGTGAGGC</u> (8) |
| 436 | GAGTGAGGA   | <u>GAGTGAGGG</u> (8) | 437 | GAGTGAGGA   | <u>GAGTGAGGG</u> (8) | 438 | GAGTGAGGA   | <u>GAGTGAGGC</u> (8) |
| 439 | GAGTGAGGA   | <u>GAGTGAGGC</u> (8) | 440 | GAGTGAGGA   | <u>GAGTGAGGC</u> (8) | 441 | GAGTGAGGA   | <u>GAGTGAGGC</u> (8) |
| 442 | GAGTGAGGA   | <u>GAGTGAGGG</u> (8) | 443 | GAGTGAGGA   | <u>GAGTGAGGC</u> (8) | 444 | GAGTGAGGA   | <u>GAGTGAGGC</u> (8) |
| 445 | GGGGAGGAG   | <u>GGGGAGGAC</u> (8) | 446 | GGGGAGGAG   | <u>GGGGAGGAC</u> (8) | 447 | GGGGAGGAG   | <u>GTGGAGGAT</u> (7) |
| 448 | GGGGAGGAG   | <u>GTGGAGGAG</u> (8) | 449 | GGGGAGGAG   | <u>GTGGAGGAG</u> (7) | 450 | GGGGAGGAG   | <u>GGGGAGGAC</u> (8) |
| 451 | GCGGCGGAC   | <u>GCGGCGGAA</u> (8) | 452 | GCGGCGGAC   | <u>GCGGCGGAA</u> (7) | 453 | GCGGCGGAC   | <u>GCGGCGGAA</u> (7) |
| 454 | GCGGCGGAC   | <u>GCGGCGGAA</u> (7) | 455 | GCGGCGGAC   | <u>GCGGCGGAA</u> (7) | 456 | GCGGCGGAC   | <u>GCGGCGGAA</u> (7) |
| 457 | GCGGCGGAC   | <u>GCGGCGGAA</u> (7) | 458 | GCGGCGGAC   | <u>GCGGCGGAA</u> (7) | 459 | GCGGCGGAC   | <u>GCGGCGGAA</u> (7) |
| 460 | GCGGCGGAC   | <u>GCGGCGGAA</u> (7) | 461 | GCGGCGGAC   | <u>GCGGCGGAA</u> (7) | 462 | GCGGCGGAC   | <u>GCGGCGGAA</u> (7) |
| 463 | GCGGCGGAC   | <u>GCGGCGGAA</u> (7) | 464 | GCGGCGGAC   | <u>GCGGCGGAA</u> (7) | 465 | GCGGCGGAC   | <u>GCGGCGGAA</u> (7) |
| 466 | GCGGCGGAC   | <u>GCGGCGGAA</u> (7) | 467 | GCGGCGGAC   | <u>GCGGCGGAA</u> (7) | 468 | GCGGCGGAC   | <u>GCGGCGGAA</u> (7) |
| 469 | GCGGCGGAC   | <u>GCGGCGGAA</u> (7) | 470 | GCGGCGGAC   | <u>GCGGCGGAA</u> (7) | 471 | GCGGCGGAC   | <u>GCGGCGGAA</u> (7) |
| 472 | GCGGCGGAC   | <u>GCGGCGGAA</u> (7) | 473 | GTGGACGCG   | <u>GTGGAAGGG</u> (7) | 474 | GTGGACGCG   | <u>GTGGACGGG</u> (8) |
| 475 | GTGGACGCG   | <u>GTGGACGGG</u> (8) | 476 | GTGGACGCG   | <u>GTGGAAGGG</u> (7) | 477 | GTGGACGCG   | <u>GTGGATGGC</u> (6) |
| 478 | GTGGACGCG   | <u>GTGGACGGG</u> (8) | 479 | GTGGACGCG   | <u>GTGGAATGT</u> (5) | 480 | GTGGACGCG   | <u>GTGGACGGG</u> (8) |
| 481 | GTGGACGCG   | <u>GAGGAAGGG</u> (6) | 482 | GTGGACGCG   | <u>GTGGAAGCG</u> (8) | 483 | GTGGACGCG   | <u>GGGGAAGCC</u> (6) |
| 484 | GCCGCTGGG   | <u>GCCGCTTGG</u> (8) | 485 | GCCGCTGGG   | <u>GCCGCTTGG</u> (8) | 486 | GCCGCTGGG   | <u>GCCGCTTGG</u> (8) |
| 487 | GCCGCTGGG   | <u>GCCGCTTGG</u> (8) | 488 | GCCGCTGGG   | <u>GACGCTTGG</u> (7) | 489 | GCCGCTGGG   | <u>GACGCTTGG</u> (7) |
| 490 | GCCGCTGGG   | <u>GACGCTTGG</u> (7) | 491 | GCTGATGCC   | <u>GCCGATGCC</u> (8) | 492 | GCTGATGCC   | <u>GCCGATGCC</u> (8) |
| 493 | GCTGATGCC   | <u>GCCGATGCC</u> (8) | 494 | GCTGATGCC   | <u>GCCGATGCC</u> (8) | 495 | GCTGATGCC   | <u>GCCGATGCC</u> (8) |
| 496 | GCTGATGCC   | <u>GCCGATGCC</u> (8) | 497 | GCTGATGCC   | <u>GCCGATGCC</u> (8) | 498 | GCTGATGCC   | <u>GCCGATGCC</u> (8) |
| 499 | GCTGATGCC   | <u>GCCGATGCC</u> (8) | 500 | GCTGATGCC   | <u>GCCGATGCC</u> (8) | 501 | GCTGATGCC   | <u>GCCGATGCC</u> (8) |
| 502 | GCGGCTGGG   | <u>GGGGCTTGG</u> (7) | 503 | GCGGCTGGG   | <u>GCGGCTTGG</u> (8) | 504 | GCGGCTGGG   | <u>GTGGCTTGG</u> (7) |
| 505 | GCGGCTGGG   | <u>GGGGCTTGG</u> (8) | 506 | GCGGCTGGG   | <u>GTGGCTTGG</u> (7) | 507 | GCGGCTGGG   | <u>GTGGCTTGG</u> (7) |
| 508 | GCGGCTGGG   | <u>GGGGCTTGG</u> (7) | 509 | GCGGCTGGG   | <u>GGGGCTTGG</u> (7) | 510 | GCGGCTGGG   | <u>GGGGCTTGG</u> (8) |
| 511 | GCGGCTGGG   | <u>GGGGCTTGG</u> (8) | 512 | GCGGCTGGG   | <u>GGGGCTTGG</u> (8) | 513 | GAGTTTGCC   | <u>GACTTTGCC</u> (8) |
| 514 | GAGTTTGCC   | <u>GATTAAGCC</u> (6) | 515 | GAGTTTGCC   | <u>GACTTTGCC</u> (8) | 516 | GAGTTTGCC   | <u>GACTGAGCC</u> (6) |
| 517 | GAGTTTGCC   | <u>GACTTTGCC</u> (8) | 518 | GAGTTTGCC   | <u>GATTTAGCT</u> (6) | 519 | GAGTTTGCC   | <u>GATTTAGCC</u> (7) |
| 520 | GAGTTTGCC   | <u>GACTGAGCC</u> (6) | 521 | GAGTTTGCC   | <u>GATTTAGCC</u> (7) | 522 | GAGTTTGCC   | <u>GACTGAGCC</u> (6) |
| 523 | GAGTTTGCC   | <u>GATTTAGCC</u> (7) | 524 | GAGTTTGCC   | <u>GATTTAGCC</u> (7) | 525 | GTGGCTGGT   | <u>GTGGCTGGG</u> (8) |
| 526 | GTGGCTGGT   | <u>GAGGCTGTA</u> (6) | 527 | GTGGCTGGT   | <u>GAGGCTGTA</u> (6) | 528 | GTGGCTGGT   | <u>GTGGCTGGG</u> (8) |
| 529 | GTGGCTGGT   | <u>GAGGCTGTA</u> (6) | 530 | GTGGCTGGT   | <u>GAGGCTGTA</u> (6) | 531 | GTGGCTGGT   | <u>GTGGATGTT</u> (7) |
| 532 | GTGGCTGGT   | <u>GAGGCTGGG</u> (7) | 533 | GTGGCTGGT   | <u>GAGGCTGTA</u> (6) | 534 | GTGGCTGGT   | <u>GAGGCTGTA</u> (6) |
| 535 | GTGGCTGGT   | <u>GAGGCTGTA</u> (6) | 536 | GGCGCTAC    | <u>GTGCGGAC</u> (6)  | 537 | GGCGCTAC    | <u>TTGGTGGG</u> (2)  |
| 538 | GGCGCTAC    | <u>TTGGACTTT</u> (3) | 539 | GGCGCTAC    | <u>TTGGCGGG</u> (3)  | 540 | GGCGCTAC    | <u>TTGGCCTTC</u> (5) |
| 541 | GGCGCTAC    | <u>TTGGCGGG</u> (3)  | 542 | GGCGCTAC    | <u>GGAGCTAC</u> (8)  | 543 | TGGGTGGCA   | <u>TGGGGGGCC</u> (7) |
| 544 | TGGGTGGCA   | <u>TGGGGGGCC</u> (7) | 545 | TGGGTGGCA   | <u>TGGGGGGCC</u> (7) | 546 | TGGGTGGCA   | <u>TGGGGGGCC</u> (7) |
| 547 | TGGGTGGCA   | <u>TGGGGGGCC</u> (7) | 548 | TGGGTGGCA   | <u>TGGGGGGCC</u> (7) | 549 | TGGGTGGCA   | <u>TAGGTGGCC</u> (7) |
| 550 | TGGGTGGCA   | <u>TGGGGGGCC</u> (7) | 551 | TGGGTGGCA   | <u>TAGGTGGCC</u> (7) | 552 | TGGGTGGCA   | <u>TGGGGGGCC</u> (7) |
| 553 | TGGGTGGCA   | <u>TAGGTGGCC</u> (7) | 554 | TGGGTGGCA   | <u>TGGGTGGTC</u> (7) | 555 | TGGGTGGCC   | <u>TGGGGGGCC</u> (8) |
| 556 | TGGGTGGCC   | <u>TGGGGTGCC</u> (9) | 557 | TGGGTGGCC   | <u>TGGGTGGTC</u> (7) | 558 | TGGGTGGCC   | <u>TGGGGGGCC</u> (8) |
| 559 | TGGGTGGCC   | <u>TGGGGCGAC</u> (7) | 560 | TGGGTGGCC   | <u>TGGGGCGCC</u> (8) | 561 | TGGGTGGCC   | <u>TGGGGAGCT</u> (7) |
| 562 | TGGGTGGCC   | <u>TGGGGCGAC</u> (7) | 563 | TGGGTGGCC   | <u>TGGGGCGCC</u> (8) | 564 | TGGGTGGCC   | <u>TGGGGCGCC</u> (8) |
| 565 | TGGGTGGCC   | <u>TGGGGCGCC</u> (8) | 566 | TGGGTGGCC   | <u>TGGGGAGCC</u> (8) | 567 | TGGGAGTCT   | <u>TGGGAGTAA</u> (7) |
| 568 | TGGGAGTCT   | <u>GTGGAGTAA</u> (5) | 569 | TGGGAGTCT   | <u>GTGGAGTAA</u> (5) | 570 | TGGGAGTCT   | <u>GTGGAGTAA</u> (5) |
| 571 | TGGGAGTCT   | <u>TGGGAGTAT</u> (8) | 572 | TGGGAGTCT   | <u>GGGGAGTAA</u> (6) | 573 | TGGGAGTCT   | <u>TGGGAGTAA</u> (7) |
| 574 | TGGGAGTCT   | <u>TTGGAGTAC</u> (6) | 575 | TGGGAGTCT   | <u>GTGGAGGTA</u> (4) | 576 | TGGGAGTCT   | <u>TTGGAGTAC</u> (5) |
| 577 | GGGGAAGAG   | <u>GGGGAAGAC</u> (8) | 578 | GGGGAAGAG   | <u>GGGGAAGAC</u> (8) | 579 | GGGGAAGAG   | <u>GGGGAAGAC</u> (8) |
| 580 | GGGGAAGAG   | <u>GGGGAAGAC</u> (8) | 581 | GGGGAAGAG   | <u>GGGGAAGAC</u> (8) | 582 | GGGGAAGAG   | <u>GGGGAAGAC</u> (8) |
| 583 | GGGGAAGAG   | <u>GGGGAAGAC</u> (8) | 584 | GGGGAAGAG   | <u>GGGGAAGAC</u> (8) | 585 | GGGGAAGAG   | <u>GGGGAAGAC</u> (8) |
| 586 | GGGGAAGAG   | <u>GGGGAAGAG</u> (9) | 587 | GGGGAAGAG   | <u>GGGGAAGAC</u> (8) | 588 | TCTGGCGCT   | <u>TTAGACGCT</u> (6) |
| 589 | TCTGGCGCT   | <u>TTAGCGCT</u> (5)  | 590 | TCTGGCGCT   | <u>TTAGCCGCA</u> (6) | 591 | TCTGGCGCT   | <u>ACAGGTGTT</u> (5) |
| 592 | TCTGGCGCT   | <u>TTGGCGTA</u> (7)  | 593 | TCTGGCGCT   | <u>TTAGCGGCC</u> (5) | 594 | TCTGGCGCT   | <u>TTAGATGCT</u> (5) |
| 595 | TCTGGCGCT   | <u>ACAGGCGTC</u> (5) | 596 | TCTGGCGCT   | <u>TTTGATGTC</u> (4) | 597 | TCTGGTTTC   | <u>GTGGCTGG</u> (4)  |
| 598 | TCTGGTTTC   | <u>TTAGGCGTT</u> (4) | 599 | TCTGGTTTC   | <u>TTAGACTGG</u> (3) | 600 | TCTGGTTTC   | <u>ACAGACTGG</u> (3) |
| 601 | GAAGGATTC   | <u>GAAGGATGG</u> (7) | 602 | GAAGGATTC   | <u>GATGGATGG</u> (6) | 603 | GAAGGATTC   | <u>GAAGGATGG</u> (7) |
| 604 | GAAGGATTC   | <u>GATGGATGG</u> (6) | 605 | GGCGGAGAT   | <u>GGCGGATTT</u> (7) | 606 | GGCGGAGAT   | <u>GGCGGATGT</u> (7) |
| 607 | GGCGGAGAT   | <u>GGCGGATTT</u> (7) | 608 | GGCGGAGAT   | <u>TTGGGAGTT</u> (5) | 609 | GGCGGAGAT   | <u>GGCGGATTT</u> (7) |
| 610 | GGCGGAGAT   | <u>GGCGGATGT</u> (7) | 611 | GGCGGAGAT   | <u>GGCGGATTT</u> (7) |     |             |                      |

Table S1: (cont.)
